# Supplementary material for: Relationship among airborne pollen, sensitization, and pollen food allergy syndrome in Asian allergic children
Source: PeerJ. 2022 Nov 1;10:e14243. doi: 10.7717/peerj.14243 (PMC9635357; doi:10.7717/peerj.14243)
Supplement: Supplemental Information 1 [file peerj-10-14243-s003.xlsx]

## Sheet: Busan
Location (1;Tochigi 2;Fukuoka 3;Busan)	age	sex	BA	AR	AC	AD	FA	Ana	PFAS(1=Y、２＝N)	Pollinosis(1=Y、２＝N)	Dp	Japanese Cedar	Cypress	Ragweed	Orchard Grass	Birch	Alder	Juniper	Pine	Tomato	Peach	Japanese Hop	Dp	Japanese Cedar	Cypress	Ragweed	Orchard Grass	Birch	Alder	Juniper	Pine	Tomato	Peach	Japanese Hop
3	7	2	2	1	1	1	1	2	1	1	2	1		1	1	1	1	1	2	1	1	1	0	2.02		10.5	5.9	100	100	1.84	0.46	4.46	33.2	1.16
3	15	2	2	1	2	1	1	2	1	1	1	2	2	2	2	1	1	2	2	2	1	2	62.8	0.36	0	0.48	0.36	44.9	43.7	0.43	0.17	0.55	4.81	0.23
3	9	1	2	1	1	1	1	2	1	1	1	2	1	2	2	1	1	2	2	2	1	2	14.1	0.01	1.5	0	0	100	100	0.1	0.03	0.03	1.41	0
3	11	1	1	1	2	2	1	2	1	1	1	2	2	2	2	2	2	2	2		2	2	66.8	0.1	0	0	0	0	0	0	0.01		0.01	0
3	16	1	2	1	2	1	1	2	1	1	1	1	2	2	2	2	2	2	2	2		2	100	0.94	0	0.27	0.4	0.27	0.17	0.54	0.21	0.3		0.2
3	9	1	2	1	2	2	1	2	1	1	1	1	2	2	1	1	1	1	1			2	100	1.26	0	0.67	2.9	2.83	1.52	2.72	1.04			0.68
3	7	2	2	1	1	1	1	2	1	1	1	2	2	2	2	1	1	2	2			2	80.4	0.1	0.15	0	0	5.34	5.46	0	0.02			0
3	10	1	2	1	1	1	2	2	2	1	1	2	1	2	1	1	1	1	2	1	1	2	7.1	0.43	0.79	0.24	0.84	62.9	68.3	0.78	0.18	1.64	5.17	0.21
3	9	1	1	1	1	2	2	2	2	1	1	2	2	2	2	1	1	2	2	2	1	2	16	0.1	0	0	0	55.9	52.2	0	0.04	0.11	3.71	0
3	9	1	2	1	1	2	2	2	2	1	1	1	2	2	1	1	1	1	2	1	1	2	33.1	1.55	0	0.47	0.95	41.5	38.4	1.49	0.25	0.76	1.76	0.33
3	9	1	2	1	2	1	2	2	2	1	1	2		2	2	2	2	2	2	2	2	2	16.8	0.43		0.32	0.4	0.31	0.42	0.31	0.5	0.54	0.25	0.2
3	10	2	2	1	1	1	2	2	2	2	1	2		2	2	2	2	2	2	2	2	2	100	0.16		0.18	0.21	0.19	0.22	0.21	0.22	0.43	0.24	0.16
3	12	1	1	1	1	1	2	2	2	1	1	2	2	2	2	1	1	2	2	2	2	2	19.7	0.06	0.2	0	0.1	3.74	7.36	0.1	0.04	0.09	0.21	0
3	9	1	2	1	1	1	2	2	2	1	1	2	2	2	2	1	1	2	2	2	2	2	56.1	0.1	0	0	0	5.57	5.49	0	0.01	0	0.13	0
3	9	1	2	1	1	1	2	2	2	1	1	2		2	2	2	2	2	2	2	2	2	100	0.25		0.08	0.14	0.15	0.17	0.57	0.11	0.17	0.1	0.21
3	9	2	2	1	1	1	1	2	2	2	1	2	2	2	2	2	2	2	2	2	2	2	3.24	0.1	0.1	0.13	0.1	0	0.1	0.11	0.26	0.26	0.06	0
3	11	1	2	1	1	2	1	2	2	2	1	2		2	2	2	2	2	2	2	2	2	100	0.07		0.11	0.09	0	0	0.33	0.08	0.06	0.06	0.07
3	10	1	1	1	2	2	2	2	2	1	1	2	2	2	2	2	2	2	2	2	2		4.01	0.04	0	0	0	0	0	0	0.09	0.16	0.05
3	7	2	2	1	2	2	2	2	2	1	1	2	2	2	2	2	2	2	2	2	2	2	100	0.05	0.1	0	0.1	0	0	0.1	0.04	0.09	0.03	0
3	12	2	2	1	2	1	2	2	2	2	1	2	2	2	2	2	2	2	2	2	2	2	70.3	0.1	0	0	0	0	0	0	0.03	0.05	0.03	0
3	9	1	2	1	1	2	2	2	2	1	1	2	2	2	2	2	2	2	2	2	2	2	100	0	0	0	0	0	0	0	0.02	0.03	0.03	0
3	17	2	2	1	1	1	1	2	2	1	1	2	2	2	2	1	1	2	2	2	2	2	66.5	0.1	0.39	0	0	4.75	5.82	0	0.01	0.01	0.02	0
3	12	1	2	1	1	1	2	2	2	1	1	2	2	2	2	2	2	2	2	2	2	2	5.92	0.01	0	0	0	0.36	0.68	0	0.01	0.03	0.01	0
3	5	1	2	1	2	1	2	2	2	2	2	2	2	2	2	2	2	2	2	2	2	2	0	0.1	0	0	0	0	0	0	0.01	0.02	0.01	0
3	7	1	2	1	1	1	2	2	2	2	1	2	2	2	2	2	2	2	2	2	2	2	1.47	0.01	0	0	0	0	0	0	0.01	0.02	0	0
3	6	2	2	1	1	2	1	2	2	2	1	2		2	2	2	2	2	2	2	2	2	5.55	0		0	0	0	0	0.01	0	0.02	0	0
3	6	2	2	1	1	1	2	2	2	1	2	2	2	2	2	2	2	2	2	2	2	2	0.39	0.04	0.1	0	0.1	0	0	0.1	0.01	0.01	0	0
3	13	1	2	1	2	2	2	2	2	2	1	2		2	2	2	2	2	2	2	2	2	27.4	0		0	0.01	0	0	0.02	0	0	0	0
3	12	1	1	1	1	2	2	2	2	2	1	2		2	2	2	2	2	2	2	2	2	63.6	0		0	0	0	0.01	0.02	0	0	0	0
3	8	2	2	1	2	2	2	2	2	2	1	2	2	2	2	2	2	2	2	2	2	2	1.69	0.01	0	0	0	0	0	0	0.01	0	0	0
3	7	2	1	1	2	1	1	2	2	2	2	2	2	2	2	2	2	2	2	2	2	2	0	0.01	0	0	0	0	0	0	0.01	0	0	0
3	11	1	1	1	2	2	2	2	2	1	1	1	1	1	1	1	1	1	1	1		1	5.73	0.87	0.92	0.9	0.99	1.03	0.88	0.9	0.8	0.89		0.76
3	7	2	2	1	1	2	2	2	2	1	1	2	2	2	2	2	2	2	2	2		2	14.1	0.24	0.25	0.28	0.36	0.16	0.16	0.25	0.23	0.34		0.18
3	8	2	2	1	2	2	2	2	2	1	1	2	2	2	2	2	2	2	2	2		2	100	0.21	0.18	0.23	0.32	0.49	0.4	0.22	0.15	0.25		0.16
3	13	1	1	1	1	2	2	2	2	2	1	2	2	2	2	2	2	2	2	2		2	100	0.1	0	0	0	0	0	0.11	0.02	0.23		0
3	8	1	2	1	2	2	2	2	2	1	1	2	2	2	2	1	1	2	2	2		2	28.8	0.11	0.23	0.23	0.21	8.78	8.87	0.18	0.11	0.22		0.11
3	8	2	1	1	1	2	2	2	2	2	1	2	2	2	2	2	2	2	2	2		2	100	0.18	0	0.2	0.33	0.14	0.12	0.2	0.13	0.2		0.1
3	11	2	1	1	2	2	2	2	2	2	1	2	2	2	2	2	2	2	2	2		2	100	0.18	0	0.17	0.41	0.12	0.1	0.19	0.1	0.17		0.12
3	6	2	2	1	1	1	2	2	2	1	1	2	2	2	2	2	2	2	1	2		1	89.4	0.63	0	0	0.32	0.39	0.16	0.55	5.63	0.12		25.2
3	5	1	1	1	1	2	2	2	2	1	1	2	2	2	2	2	2	2	2	2		2	100	0.12	0	0.17	0.45	0.12	0.1	0.19	0.11	0.1		0
3	6	1	1	1	2	2	2	2	2	2	1	2	2	2	2	2	2	2	2	2		2	45.4	0.1	0	0	0	0	0	0	0.01	0.07		0
3	12	1	2	1	2	2	2	2	2	1	1	2	2	2	2	1	1	2	2	2		2	1.76	0.11	0	0	0	16.3	17.3	0	0.08	0.06		0.13
3	9	1	2	1	1	1	2	2	2	2	1	2	2	2	2	2	2	2	2	2		2	13.9	0.1	0	0	0	0	0	0	0.04	0.04		0
3	6	2	1	1	1	2	2	2	2	2	1	2	2	2	2	2	2	2	2	2		2	100	0.1	0	0	0	0	0	0	0.01	0.03		0
3	15	2	2	1	2	2	2	2	2	1	2	2	2	2	2	2	2	2	2	2			0	0.1	0	0	0	0	0	0	0.01	0.03
3	6	1	1	1	2	2	2	2	2	2	1	2	2	2	2	2	2	2	2	2		2	75.4	0.1	0	0	0.11	0	0	0	0.01	0.02		0
3	13	1	2	1	1	2	2	2	2	1		2	2	2	2	2	2	2	2	2		1		0.1	0	0	0	0	0	0	0.01	0.01		5.96
3	11	1	2	1	2	2	2	2	2	2	2	2	2	2	2	2	2	2	2	2		2	0.26	0.1	0	0	0.01	0	0	0	0.01	0.01		0
3	5	1	2	1	1	2	2	2	2	1	1	2	2	2	2	2	1	2	2	2		2	0.88	0.1	0	0	0	0.38	1.19	0	0.01	0.01		0
3	6	2	2	2	1	1	1	2	2	2	1	2	2	2	2	2	2	2	2	2		2	1.52	0.01	0.1	0	0	0	0	0.1	0.01	0		0
3	11	1	2	1	1	1	1	2	2	1	1	1	2	1	1	1	1	2	2			1	100	1.06	0	1.31	1.5	40.5	54.5	0.64	0.56			1.01
3	5	1	2	1	2	2	2	2	2	1	2	2	2	2	2	1	1	2	2			2	0	0.35	0	0.21	0.18	14.6	23.8	0.25	0.13			0.11
3	12	1	2	1	1	2	2	2	2	2	1	2	2	2	2	2	2	2	2			2	100	0.11	0	0.13	0.13	0.14	0.11	0.14	0.09			0
3	10	1	1	1	1	2	2	2	2	2	1	2	2	2	2	2	2	2	2			2	14.2	0.1	0	0	0	0.23	0.27	0	0.01			0
3	10	1	1	1	2	2	2	2	2	2	2	2	2	2	2	2	2	2	2			2	0	0.1	0	0	0	0	0	0	0.01			0
3	8	2	2	1	2	2	2	2	2	2	2	2	2	2	2	2	2	2	2			2	0	0.1	0	0	0	0	0	0	0.01			0
3	8	1	2	1	1	2	2	2	2	2	2	2	2	2	2	2	2	2	2			2	0.14	0.1	0	0	0	0	0	0	0.01			0
	9
	5
	17

## Sheet: Tochigi
Location (1;Tochigi 2;Fukuoka 3;Busan)	age	sex	BA	AR	AC	AD	FA	Ana	PFAS(1=Y、２＝N)	Pollinosis(1=Y、２＝N)	Dp	Japanese Cedar	Cypress	Ragweed	Orchard Grass	Birch	Alder	Juniper	Pine	Tomato	Peach	Japanese Hop	Dp	Japanese Cedar	Cypress	Ragweed	Orchard Grass	Birch	Alder	Juniper	Pine	Tomato	Peach	Japanese Hop
1	15	1	1	2	2	2	1	1	1	2	1	1	1	1	1	1	1	1	1	1	1	1	100	100	23.8	5.66	6.99	100	100	40.4	0.76	1.36	11.3	1.16
1	9	2	1	1	1	2	1	2	1	1	1	1	1	2	1	1	1	1	2	1	1	2	100	61.4	2.37	0.49	0.99	1.66	0.88	1.8	0.33	0.83	1.12	0.56
1	7	1	2	1	2	2	1	1	1	2	2	2	2		2	2	2	2	2	2	2	2	0.1	0.1	0.1		0.1	0.1	0.1	0.1	0.1	0.1	0.1	0.1
1	10	1	2	1	2	2	1	2	1	1	1	1	1	2	1	1	1	1	2	2	2	2	86	29.5	3.54	0.2	2.47	2.06	1.66	4.29	0.1	0.18	0.13	0.1
1	10	1	1	1	2	1	1	2	1	2	1	1	1	2	2	1	1	1	2	2	2	2	83.5	17.6	1.32	0.2	0.31	11.7	10.7	0.92	0.1	0.1	0.64	0.1
1	10	1	2	2	2	2	1	1	1	1	1	1	1	1	1	1	1	1	1	1	1	1	100	100	27	5.62	7.31	6.81	6.08	17.7	1.96	3.88	3.54	3.57
1	11	1	1	1	1	1	2	2	2	1	1	1	1	2	1	1	1	1	2	1	1	1	9.45	100	28.3	0.24	12.6	3.11	1.69	15.7	0.41	0.81	1.05	0.85
1	6	1	1	2	2	2	1	2	2	2	2	2	2	2	2	2	2	2	2	2	2	2	20.6	0.17	0.1	0.1	0.1	0.1	0.1	0.1	0.1	0.1	0.1	0.1
1	7	2	2	2	2	1	1	2	2	2	1	1	1	2	2	1	1	1	2	2	1	2	20.3	40	2.63	0.33	0.56	24.3	19.2	3.33	0.49	0.36	1.33	0.28
1	7	2	2	1	1	1	2	2	2	1	1	1	1	2	1	2	2	1	2	2	2	2	65.2	100	14.3	0.14	8.75	0.16	0.14	14.6	0.13	0.14	0.16	0.15
1	8	2	1	1	1	2	1	2	2	1	1	1	2	2	2	2	2	2	2	2	2	2	68.9	4.76	0.1	0.1	0.1	0.1	0.1	0.1	0.1	0.1	0.1	0.1
1	8	2	2	1	2	2	2	2	2	2	2	2	2	2	2	2	2	2	2	2	2	2	0.1	0.1	0.1	0.1	0.1	0.1	0.1	0.1	0.1	0.1	0.1	0.1
1	12	2	1	1	1	2	2	2	2	1	1	1	1	2	2	2	2	1	2	2	2	2	100	22.1	7.38	0.22	0.31	0.23	0.19	4.7	0.21	0.25	0.19	0.16
1	11	1	1	1	2	2	2	2	2	1	1	1	1	2	2	2	2	2	2	2	2	2	0.93	5.24	0.94	0.1	0.11	0.13	0.1	0.61	0.1	0.1	0.1	0.1
1	10	2	2	2	2	2	1	2	2	2	1	2	2	2	2	2	2	2	2	2	2	2	0.73	0.33	0.1	0.1	0.1	0.1	0.1	0.11	0.1	0.1	0.1	0.1
1	14	1	1	1	1	2	2	2	2	1	1	1	2	2	2	2	2	2	2	2	2	2	81.7	0.99	0.38	0.43	0.45	0.31	0.43	0.39	0.4	0.43	0.34	0.33
1	15	2	1	2	1	1	1	2	2	2	1	1	1	2	2	2	2	1	2	2	2	2	71.9	8.52	1.3	0.59	0.29	0.1	0.1	3.95	0.1	0.13	0.1	0.1
1	10	2	1	1	1	1	2	2	2	1	1	1	1	2	1	2	2	1	2	2	2	2	12.6	100	10.9	0.1	3.85	0.29	0.22	9.55	0.1	0.25	0.16	0.1
1	9	2	2	2	2	1	1	2	2	2	2	2	2	2	2	2	2	2	2	2	2	2	0.1	0.1	0.1	0.1	0.1	0.1	0.1	0.1	0.1	0.1	0.1	0.1
1	7	1	1	1	1	2	1	2	2	1	1	1	1	1	1	1	1	1	1	1	1	1	100	17.6	5.62	0.94	3.12	34.6	23.4	3.69	1.19	2.27	5.18	1.95
	10
	6
	15

## Sheet: Fukuoka
Location (1;Tochigi 2;Fukuoka 3;Busan)	age	sex	BA	AR	AC	AD	FA	Ana	PFAS(1=Y、２＝N)	Pollinosis(1=Y、２＝N)	Dp	Japanese Cedar	Cypress	Ragweed	Orchard Grass	Birch	Alder	Juniper	Pine	Tomato	Peach	Japanese Hop	Dp	Japanese Cedar	Cypress	Ragweed	Orchard Grass	Birch	Alder	Juniper	Pine	Tomato	Peach	Japanese Hop
2	12	1	1	1	2	1	1	2	1	1	1	1	1	2	2	2	2	1	2	2	2	2	100	5.03	1.43	0.04	0.07	0.05	0.08	1.35	0.05	0.05	0.06	0.04
2	10	1	1	1	1	1	1	1	1	2	1	1	1	2	2	2	2	1	2	2	2	2	32.2	100	17.3	0.1	0.1	0.06	0.09	18.1	0.04	0.47	0.03	0.02
2	10	1	2	1	1	2	1	2	1	2	1	1	1	1	1	1	2	1	2	2	2	2	100	100	11.0	0.76	2.29	0.78	0.56	12.3	0.44	0.67	0.60	0.27
2	8	1	2	2		2	1	2	1	2	1	1	1	1	1		1			1		2	100	100	3.30	2.05	1.05		2.75			1.43		0.52
2	9	1	1	1	2	1	1	1	1	1	1	1	1	2	1	1	1	1	1	1	1	1	100	100	18.3	0.54	4.39	4.38	3.09	12.5	1.01	2.31	1.87	1.41
2	9	1	2	1	2	2	1	1	1	1	1	1	1	1	1	1	1	1	1	1	1	1	100	100	5.40	11.0	7.96	14.9	15.1	9.87	1.45	6.89	2.45	3.39
2	6	1	2	2		1	1	1	1	2	1	1	1	1	1		1	1	1	1	1	1	100	100	11.6	7.97	36.8		68.2	14.3	6.6	7.03	51.9	3.84
2	12	2	1	1	2	1	1	2	1	2	1	2	2	2	2	2	2	2	2	2	2	2	18.2	0.67	0.26	0.01	0.03	0.01	0.02	0.07	0.01	0.02	0.02	0.03
2	11	2	2	1	1	1	1	1	1	1	1	1	1	2	2	2	2	1	2	2	2	2	100	25.5	6.43	0.02	0.04	0.03	0.02	1.81	0.03	0.06	0.02	0.04
2	10	2	2	1	1	1	1	1	1	2	1	1	2	2	2	2	2	2	2	2	2	2	100	1.30	0.13	0.03	0.15	0.03	0.05	0.10	0.02	0.06	0.04	0.02
2	10	2	2	1	1	2	1	2	1	1	1	1	1	2	2	2	2			2		2	100	86.7	8.80	0.06	0.08	0.08	0.08			0.06		0.01
2	13	2	1	1	1	1	1	2	1	1	2	1	1	1	1	1	1	1	1	1	1	1	0.15	100	65.1	1	17.1	1.2	1.05	71.5	0.84	1.09	0.83	0.75
2	11	2	2	2		1	1	2	1	1	1	1	1	1	1	1	1	1		1		1	100	86.8	10.7	0.76	8.55	1.71	1.55	13.9		1.60		1.31
2	7	2	1	1	2	2	1	2	1	2	1	1	1	1	1		1					1	100	5.20	2.83	2.93	3.30		2.35					1.80
2	10	1	1	1	1	1	2	2	2	1	1	1	1	2	2	2	2	1	2	2		2	51.9	15.2	3.12	0.01	0.01	0.02	0.02	6.68	0.00	0.00		0.00
2	10	1	1	1	1	2	2	2	2	1	1	1	2	2	2	2	2	2	2	2	2	2	76.2	1.13	0.57	0.00	0.00	0.00	0.00	0.18	0.00	0.02	0.00	0.00
2	7	1	2	1	2	2	1	2	2	2	1	2	2	2	2	2	2	2	2	2	2	2	6.60	0.12	0.01	0.04	0.02	0.00	0.03	0.03	0.01	0.02	0.00	0.00
2	13	1	1	1	2	2	2	2	2	2	1	2	2	2	2	2	2	2	2	2		2	16.8	0.57	0.25	0.04	0.03	0.11	0.08	0.34	0.01	0.02		0.01
2	10	1	2	1	1	2	1	2	2	1	1	1	1	2	2	2	2	1	2	2	2	2	2.35	86.3	20.4	0.06	0.04	0.35	0.17	11.1	0.02	0.07	0.02	0.03
2	12	1	1	1	1	2	1	2	2	1	1	1	1	2	1	2	2	1	2	2	2	2	100	60.9	2.01	0.55	1.17	0.12	0.15	1.28	0.15	0.09	0.03	0.04
2	9	1	1	1	1	1	1	2	2	1	1	1	1	2	2	2	2	1	2	2	2	2	100	38.5	15.4	0.09	0.19	0.08	0.09	11.3	0.07	0.09	0.14	0.07
2	9	1	1	1	2	2	2	2	2	1	1	1	2	2	2	2	2	2	2	2	2	2	100	1.53	0.08	0.08	0.13	0.09	0.09	0.12	0.07	0.11	0.10	0.06
2	7	1	1	1	1	1	1	2	2	1	1	1	1	2	2	2	2	1	2	2		2	63.5	66.2	6.91	0.15	0.14	0.07	0.06	5.16	0.06	0.11		0.04
2	11	1	2	1	2	2	1	2	2	1	1	1	1	2	2	1	1	1	2	2	2	2	73.7	100	9.25	0.31	0.19	2.34	2.05	10.6	0.10	0.15	0.17	0.20
2	11	1	2	1	2	1	1	2	2	1	1	1	1	2	2	2	2	1	2	2	2	2	100	57.9	1.43	0.15	0.22	0.23	0.24	2.23	0.16	0.19	0.30	0.16
2	8	1	2	1	2	1	1	2	2	2	1	1	2	2	2		2			2		2	100	6.44	0.48	0.29	0.35		0.22			0.21		0.51
2	8	1	1	1	2	1	1	2	2	2	1	1	1	1	2	2	2	1	2	2	2	2	40.7	100	2.19	1.84	0.32	0.41	0.23	6.81	0.14	0.22	0.25	0.15
2	7	1	1	1	2	2	2	2	2	2		1	2	2	2	2	2	2	2	2		2		4.37	0.16	0.09	0.20	0.11	0.25	0.15	0.09	0.23		0.19
2	11	1	1	1	1	2	1	2	2	1	1	1	1	2	2	2	2	1	2	2	2	2	100	100	5.88	0.07	0.32	0.40	0.43	6.70	0.09	0.32	0.15	0.24
2	7	1	1	1	2	2	1	2	2	1	1	1	1	2	2	2	2	1	2	2	2	2	100	12.9	2.33	0.17	0.17	0.30	0.25	1.60	0.11	0.34	0.11	0.11
2	11	1	1	1	1	2	1	2	2	1	1	1	1	2	2	2	2	1	2	2	2	2	100	25.4	0.75	0.55	0.54	0.57	0.50	3.03	0.54	0.61	0.39	0.37
2	11	1	2	2		2	1	2	2	2	1	1	1	2	1	2	2	1	2	2	2	2	1.25	11.5	1.07	0.49	0.91	0.62	0.52	1.48	0.30	0.64	0.31	0.40
2	12	1	1	1	2	2	1	2	2	2	1	2	2	2	2	2	2	2		1		2	100	0.24	0.26	0.16	0.25	0.52	0.34	0.36		0.77		0.13
2	9	1	1	1	1	2	1	2	2	2	1	1	1	2	2		2			1		2	0.87	100	11.0	0.07	0.14		0.12			1.32		0.03
2	9	1	1	1	1	2	1	2	2	1	1	1	1	1	1	1	1	1	1	1	1	1	64	100	65.2	52.6	94.1	92.9	100	65.2	2.75	1.77	1.19	68.6
2	8	1	2	1	2	1	1	2	2	2	1	1	1			2	2	1	2	1	2	2	100	4.82	0.97			0.6	0.38	2.92	0.36	1.84	0.52	0.41
2	9	1	2	1	2	2	1	2	2	1	1	1	1	1	1					1			100	100	13.5	1.31	2.99					2.89
2	10	1	1	1	2	1	1	2	2	1	1	1	1	1	1	1	1	1	1	1	1	1	80.4	100	44.3	7.22	39.9	17	6.90	28	2.53	7.90	3.41	2.38
2	8	1	2	1	2	1	1	2	2	2	2	2	2	2	2	2	2					2	0.55	0.05	0	0	0.01	0	0					0
2	11	1	1	1	2	1	1	2	2	1	1	1	1	2	2	1	1					2	80.7	5.31	1.37	0.34	0.54	0.94	0.71					0.23
2	9	1	1	1	1	1	2	2	2	1	1	1	1			1							100	100	12.2			6.07
2	14	1	1	1	2	1	1	2	2	2	1	1	1	2	2		1					2	100	10.7	13.3	0.39	0.55		0.95					0.63
2	9	2	2	1	2	2	2	2	2	2	1	1	1	2	1	2	2	1	2	2	2	2	79.2	11.4	2.18	0.01	5.32	0.01	0.01	1.84	0.01	0.01	0.06	0
2	7	2	1	1	1	1	1	2	2	1	1	1	1	2	2	2	2	1	2	2		2	60.9	23.2	7.10	0.01	0.02	0.00	0.00	7.34	0.00	0.03		0.00
2	10	2	2	1	2	2	1	2	2	1	1	1	1	2	1	2	2	1	2	2	2	2	57.3	24.7	1.46	0.02	3.56	0.00	0.01	1.40	0.00	0.03	0.02	0.00
2	6	2	2	1	1	2	1	2	2	1	2	1	1	2	1	2	2	1	2	2	2	2	0.50	100	15.5	0.04	5.88	0.07	0.13	48.1	0.04	0.05	0.09	0.02
2	11	2	1	1	2	2	2	2	2	2	1	1	1	2	2	2	2	1	2	2	2	2	14.6	16.6	3.64	0.09	0.16	0.16	0.16	1.9	0.1	0.15	0.12	0.13
2	8	2	2	1	1	1	1	2	2	2	1	1	1	2	2	2	2			2		2	79.1	17.7	1.89	0.06	0.20	0.16	0.11			0.21		0.11
2	7	2	1	1	2	2	1	2	2	2	1	1	2	2	2	2	2	2	2	2	2	2	100	6.10	0.42	0.09	0.13	0.08	0.06	0.15	0.06	0.28	0.15	0.07
2	10	2	2	1	1	1	1	2	2	1	2	1	1	2	1	2	2	1	2	2	2	2	0.15	100	50.0	0.22	7.79	0.26	0.34	62.5	0.24	0.34	0.32	0.20
2	7	2	1	1	2	1	1	2	2	2	1	2	2	2	2	2	2			2		2	100	0.59	0.03	0.02	0.03	0.02	0.03			0.38		0.02
2	11	2	2	1	2	2	2	2	2	1	2	1	1	2	1	1	2	1	2	2	2	2	0.05	100	18.8	0.13	0.77	0.72	0.49	17.1	0.20	0.44	0.44	0.38
2	10	2	2	1	1	2	2	2	2	2	1	1	1	2	2	2	2	1	2	2	2	2	100	73.0	6.87	0.42	0.39	0.37	0.30	12.2	0.28	0.63	0.27	0.22
2	9	2	1	1	1	2	1	2	2	1	1	1	1	1	1	1	1	1	1	1	1	2	100	100	32.3	0.82	0.89	4.32	2.54	46.0	0.93	0.81	0.81	0.36
2	12	2	2	1	2	1	2	2	2	1	1	1	1	2	2	2	2	1	2	1	2	2	100	46.6	10.9	0.52	0.43	0.59	0.51	7.18	0.23	0.93	0.30	0.31
2	12	2	1	1	2	1	1	2	2	1	1	1	1	2	2	2	2		2			2	50.4	10.6	4.08	0.03	0.04	0.04	0.03		0.03			0.02

## Sheet: Total
Location (1;Tochigi 2;Fukuoka 3;Busan)	age	sex	BA	AR	AC	AD	FA	Ana	PFAS(1=Y、２＝N)	Pollinosis(1=Y、２＝N)	Dp	Japanese Cedar	Cypress	Ragweed	Orchard Grass	Birch	Alder	Juniper	Pine	Tomato	Peach	Japanese Hop	Dp	Japanese Cedar	Cypress	Ragweed	Orchard Grass	Birch	Alder	Juniper	Pine	Tomato	Peach	Japanese Hop
1	15	1	1	2	2	2	1	1	1	2	1	1	1	1	1	1	1	1	1	1	1	1	100	100	23.8	5.66	6.99	100	100	40.4	0.76	1.36	11.3	1.16
1	7	1	2	1	2	2	1	1	1	2	2	2	2		2	2	2	2	2	2	2	2	0.1	0.1	0.1		0.1	0.1	0.1	0.1	0.1	0.1	0.1	0.1
1	10	1	2	1	2	2	1	2	1	1	1	1	1	2	1	1	1	1	2	2	2	2	86	29.5	3.54	0.2	2.47	2.06	1.66	4.29	0.1	0.18	0.13	0.1
1	10	1	1	1	2	1	1	2	1	2	1	1	1	2	2	1	1	1	2	2	2	2	83.5	17.6	1.32	0.2	0.31	11.7	10.7	0.92	0.1	0.1	0.64	0.1
1	10	1	2	2	2	2	1	1	1	1	1	1	1	1	1	1	1	1	1	1	1	1	100	100	27	5.62	7.31	6.81	6.08	17.7	1.96	3.88	3.54	3.57
1	9	2	1	1	1	2	1	2	1	1	1	1	1	2	1	1	1	1	2	1	1	2	100	61.4	2.37	0.49	0.99	1.66	0.88	1.8	0.33	0.83	1.12	0.56
1	11	1	1	1	1	1	2	2	2	1	1	1	1	2	1	1	1	1	2	1	1	1	9.45	100	28.3	0.24	12.6	3.11	1.69	15.7	0.41	0.81	1.05	0.85
1	6	1	1	2	2	2	1	2	2	2	2	2	2	2	2	2	2	2	2	2	2	2	20.6	0.17	0.1	0.1	0.1	0.1	0.1	0.1	0.1	0.1	0.1	0.1
1	11	1	1	1	2	2	2	2	2	1	1	1	1	2	2	2	2	2	2	2	2	2	0.93	5.24	0.94	0.1	0.11	0.13	0.1	0.61	0.1	0.1	0.1	0.1
1	14	1	1	1	1	2	2	2	2	1	1	1	2	2	2	2	2	2	2	2	2	2	81.7	0.99	0.38	0.43	0.45	0.31	0.43	0.39	0.4	0.43	0.34	0.33
1	7	1	1	1	1	2	1	2	2	1	1	1	1	1	1	1	1	1	1	1	1	1	100	17.6	5.62	0.94	3.12	34.6	23.4	3.69	1.19	2.27	5.18	1.95
1	7	2	2	2	2	1	1	2	2	2	1	1	1	2	2	1	1	1	2	2	1	2	20.3	40	2.63	0.33	0.56	24.3	19.2	3.33	0.49	0.36	1.33	0.28
1	7	2	2	1	1	1	2	2	2	1	1	1	1	2	1	2	2	1	2	2	2	2	65.2	100	14.3	0.14	8.75	0.16	0.14	14.6	0.13	0.14	0.16	0.15
1	8	2	1	1	1	2	1	2	2	1	1	1	2	2	2	2	2	2	2	2	2	2	68.9	4.76	0.1	0.1	0.1	0.1	0.1	0.1	0.1	0.1	0.1	0.1
1	8	2	2	1	2	2	2	2	2	2	2	2	2	2	2	2	2	2	2	2	2	2	0.1	0.1	0.1	0.1	0.1	0.1	0.1	0.1	0.1	0.1	0.1	0.1
1	12	2	1	1	1	2	2	2	2	1	1	1	1	2	2	2	2	1	2	2	2	2	100	22.1	7.38	0.22	0.31	0.23	0.19	4.7	0.21	0.25	0.19	0.16
1	10	2	2	2	2	2	1	2	2	2	1	2	2	2	2	2	2	2	2	2	2	2	0.73	0.33	0.1	0.1	0.1	0.1	0.1	0.11	0.1	0.1	0.1	0.1
1	15	2	1	2	1	1	1	2	2	2	1	1	1	2	2	2	2	1	2	2	2	2	71.9	8.52	1.3	0.59	0.29	0.1	0.1	3.95	0.1	0.13	0.1	0.1
1	10	2	1	1	1	1	2	2	2	1	1	1	1	2	1	2	2	1	2	2	2	2	12.6	100	10.9	0.1	3.85	0.29	0.22	9.55	0.1	0.25	0.16	0.1
1	9	2	2	2	2	1	1	2	2	2	2	2	2	2	2	2	2	2	2	2	2	2	0.1	0.1	0.1	0.1	0.1	0.1	0.1	0.1	0.1	0.1	0.1	0.1
2	12	1	1	1	2	1	1	2	1	1	1	1	1	2	2	2	2	1	2	2	2	2	100	5.03	1.43	0.04	0.07	0.05	0.08	1.35	0.05	0.05	0.06	0.04
2	10	1	1	1	1	1	1	1	1	2	1	1	1	2	2	2	2	1	2	2	2	2	32.2	100	17.3	0.1	0.1	0.06	0.09	18.1	0.04	0.47	0.03	0.02
2	10	1	2	1	1	2	1	2	1	2	1	1	1	1	1	1	2	1	2	2	2	2	100	100	11.0	0.76	2.29	0.78	0.56	12.3	0.44	0.67	0.60	0.27
2	8	1	2	2		2	1	2	1	2	1	1	1	1	1		1			1		2	100	100	3.30	2.05	1.05		2.75			1.43		0.52
2	9	1	1	1	2	1	1	1	1	1	1	1	1	2	1	1	1	1	1	1	1	1	100	100	18.3	0.54	4.39	4.38	3.09	12.5	1.01	2.31	1.87	1.41
2	9	1	2	1	2	2	1	1	1	1	1	1	1	1	1	1	1	1	1	1	1	1	100	100	5.40	11.0	7.96	14.9	15.1	9.87	1.45	6.89	2.45	3.39
2	6	1	2	2		1	1	1	1	2	1	1	1	1	1		1	1	1	1	1	1	100	100	11.6	7.97	36.8		68.2	14.3	6.6	7.03	51.9	3.84
2	12	2	1	1	2	1	1	2	1	2	1	2	2	2	2	2	2	2	2	2	2	2	18.2	0.67	0.26	0.01	0.03	0.01	0.02	0.07	0.01	0.02	0.02	0.03
2	11	2	2	1	1	1	1	1	1	1	1	1	1	2	2	2	2	1	2	2	2	2	100	25.5	6.43	0.02	0.04	0.03	0.02	1.81	0.03	0.06	0.02	0.04
2	10	2	2	1	1	1	1	1	1	2	1	1	2	2	2	2	2	2	2	2	2	2	100	1.30	0.13	0.03	0.15	0.03	0.05	0.10	0.02	0.06	0.04	0.02
2	10	2	2	1	1	2	1	2	1	1	1	1	1	2	2	2	2			2		2	100	86.7	8.80	0.06	0.08	0.08	0.08			0.06		0.01
2	13	2	1	1	1	1	1	2	1	1	2	1	1	1	1	1	1	1	1	1	1	1	0.15	100	65.1	1	17.1	1.2	1.05	71.5	0.84	1.09	0.83	0.75
2	11	2	2	2		1	1	2	1	1	1	1	1	1	1	1	1	1		1		1	100	86.8	10.7	0.76	8.55	1.71	1.55	13.9		1.60		1.31
2	7	2	1	1	2	2	1	2	1	2	1	1	1	1	1		1					1	100	5.20	2.83	2.93	3.30		2.35					1.80
2	10	1	1	1	1	1	2	2	2	1	1	1	1	2	2	2	2	1	2	2		2	51.9	15.2	3.12	0.01	0.01	0.02	0.02	6.68	0.00	0.00		0.00
2	10	1	1	1	1	2	2	2	2	1	1	1	2	2	2	2	2	2	2	2	2	2	76.2	1.13	0.57	0.00	0.00	0.00	0.00	0.18	0.00	0.02	0.00	0.00
2	7	1	2	1	2	2	1	2	2	2	1	2	2	2	2	2	2	2	2	2	2	2	6.60	0.12	0.01	0.04	0.02	0.00	0.03	0.03	0.01	0.02	0.00	0.00
2	13	1	1	1	2	2	2	2	2	2	1	2	2	2	2	2	2	2	2	2		2	16.8	0.57	0.25	0.04	0.03	0.11	0.08	0.34	0.01	0.02		0.01
2	10	1	2	1	1	2	1	2	2	1	1	1	1	2	2	2	2	1	2	2	2	2	2.35	86.3	20.4	0.06	0.04	0.35	0.17	11.1	0.02	0.07	0.02	0.03
2	12	1	1	1	1	2	1	2	2	1	1	1	1	2	1	2	2	1	2	2	2	2	100	60.9	2.01	0.55	1.17	0.12	0.15	1.28	0.15	0.09	0.03	0.04
2	9	1	1	1	1	1	1	2	2	1	1	1	1	2	2	2	2	1	2	2	2	2	100	38.5	15.4	0.09	0.19	0.08	0.09	11.3	0.07	0.09	0.14	0.07
2	9	1	1	1	2	2	2	2	2	1	1	1	2	2	2	2	2	2	2	2	2	2	100	1.53	0.08	0.08	0.13	0.09	0.09	0.12	0.07	0.11	0.10	0.06
2	7	1	1	1	1	1	1	2	2	1	1	1	1	2	2	2	2	1	2	2		2	63.5	66.2	6.91	0.15	0.14	0.07	0.06	5.16	0.06	0.11		0.04
2	11	1	2	1	2	2	1	2	2	1	1	1	1	2	2	1	1	1	2	2	2	2	73.7	100	9.25	0.31	0.19	2.34	2.05	10.6	0.10	0.15	0.17	0.20
2	11	1	2	1	2	1	1	2	2	1	1	1	1	2	2	2	2	1	2	2	2	2	100	57.9	1.43	0.15	0.22	0.23	0.24	2.23	0.16	0.19	0.30	0.16
2	8	1	2	1	2	1	1	2	2	2	1	1	2	2	2		2			2		2	100	6.44	0.48	0.29	0.35		0.22			0.21		0.51
2	8	1	1	1	2	1	1	2	2	2	1	1	1	1	2	2	2	1	2	2	2	2	40.7	100	2.19	1.84	0.32	0.41	0.23	6.81	0.14	0.22	0.25	0.15
2	7	1	1	1	2	2	2	2	2	2		1	2	2	2	2	2	2	2	2		2		4.37	0.16	0.09	0.20	0.11	0.25	0.15	0.09	0.23		0.19
2	11	1	1	1	1	2	1	2	2	1	1	1	1	2	2	2	2	1	2	2	2	2	100	100	5.88	0.07	0.32	0.40	0.43	6.70	0.09	0.32	0.15	0.24
2	7	1	1	1	2	2	1	2	2	1	1	1	1	2	2	2	2	1	2	2	2	2	100	12.9	2.33	0.17	0.17	0.30	0.25	1.60	0.11	0.34	0.11	0.11
2	11	1	1	1	1	2	1	2	2	1	1	1	1	2	2	2	2	1	2	2	2	2	100	25.4	0.75	0.55	0.54	0.57	0.50	3.03	0.54	0.61	0.39	0.37
2	11	1	2	2		2	1	2	2	2	1	1	1	2	1	2	2	1	2	2	2	2	1.25	11.5	1.07	0.49	0.91	0.62	0.52	1.48	0.30	0.64	0.31	0.40
2	12	1	1	1	2	2	1	2	2	2	1	2	2	2	2	2	2	2		1		2	100	0.24	0.26	0.16	0.25	0.52	0.34	0.36		0.77		0.13
2	9	1	1	1	1	2	1	2	2	2	1	1	1	2	2		2			1		2	0.87	100	11.0	0.07	0.14		0.12			1.32		0.03
2	9	1	1	1	1	2	1	2	2	1	1	1	1	1	1	1	1	1	1	1	1	1	64	100	65.2	52.6	94.1	92.9	100	65.2	2.75	1.77	1.19	68.6
2	8	1	2	1	2	1	1	2	2	2	1	1	1			2	2	1	2	1	2	2	100	4.82	0.97			0.6	0.38	2.92	0.36	1.84	0.52	0.41
2	9	1	2	1	2	2	1	2	2	1	1	1	1	1	1					1			100	100	13.5	1.31	2.99					2.89
2	10	1	1	1	2	1	1	2	2	1	1	1	1	1	1	1	1	1	1	1	1	1	80.4	100	44.3	7.22	39.9	17	6.90	28	2.53	7.90	3.41	2.38
2	8	1	2	1	2	1	1	2	2	2	2	2	2	2	2	2	2					2	0.55	0.05	0	0	0.01	0	0					0
2	11	1	1	1	2	1	1	2	2	1	1	1	1	2	2	1	1					2	80.7	5.31	1.37	0.34	0.54	0.94	0.71					0.23
2	9	1	1	1	1	1	2	2	2	1	1	1	1			1							100	100	12.2			6.07
2	14	1	1	1	2	1	1	2	2	2	1	1	1	2	2		1					2	100	10.7	13.3	0.39	0.55		0.95					0.63
2	9	2	2	1	2	2	2	2	2	2	1	1	1	2	1	2	2	1	2	2	2	2	79.2	11.4	2.18	0.01	5.32	0.01	0.01	1.84	0.01	0.01	0.06	0
2	7	2	1	1	1	1	1	2	2	1	1	1	1	2	2	2	2	1	2	2		2	60.9	23.2	7.10	0.01	0.02	0.00	0.00	7.34	0.00	0.03		0.00
2	10	2	2	1	2	2	1	2	2	1	1	1	1	2	1	2	2	1	2	2	2	2	57.3	24.7	1.46	0.02	3.56	0.00	0.01	1.40	0.00	0.03	0.02	0.00
2	6	2	2	1	1	2	1	2	2	1	2	1	1	2	1	2	2	1	2	2	2	2	0.50	100	15.5	0.04	5.88	0.07	0.13	48.1	0.04	0.05	0.09	0.02
2	11	2	1	1	2	2	2	2	2	2	1	1	1	2	2	2	2	1	2	2	2	2	14.6	16.6	3.64	0.09	0.16	0.16	0.16	1.9	0.1	0.15	0.12	0.13
2	8	2	2	1	1	1	1	2	2	2	1	1	1	2	2	2	2			2		2	79.1	17.7	1.89	0.06	0.20	0.16	0.11			0.21		0.11
2	7	2	1	1	2	2	1	2	2	2	1	1	2	2	2	2	2	2	2	2	2	2	100	6.10	0.42	0.09	0.13	0.08	0.06	0.15	0.06	0.28	0.15	0.07
2	10	2	2	1	1	1	1	2	2	1	2	1	1	2	1	2	2	1	2	2	2	2	0.15	100	50.0	0.22	7.79	0.26	0.34	62.5	0.24	0.34	0.32	0.20
2	7	2	1	1	2	1	1	2	2	2	1	2	2	2	2	2	2			2		2	100	0.59	0.03	0.02	0.03	0.02	0.03			0.38		0.02
2	11	2	2	1	2	2	2	2	2	1	2	1	1	2	1	1	2	1	2	2	2	2	0.05	100	18.8	0.13	0.77	0.72	0.49	17.1	0.20	0.44	0.44	0.38
2	10	2	2	1	1	2	2	2	2	2	1	1	1	2	2	2	2	1	2	2	2	2	100	73.0	6.87	0.42	0.39	0.37	0.30	12.2	0.28	0.63	0.27	0.22
2	9	2	1	1	1	2	1	2	2	1	1	1	1	1	1	1	1	1	1	1	1	2	100	100	32.3	0.82	0.89	4.32	2.54	46.0	0.93	0.81	0.81	0.36
2	12	2	2	1	2	1	2	2	2	1	1	1	1	2	2	2	2	1	2	1	2	2	100	46.6	10.9	0.52	0.43	0.59	0.51	7.18	0.23	0.93	0.30	0.31
2	12	2	1	1	2	1	1	2	2	1	1	1	1	2	2	2	2		2			2	50.4	10.6	4.08	0.03	0.04	0.04	0.03		0.03			0.02
3	11	1	1	1	2	2	1	2	1	1	1	2	2	2	2	2	2	2	2		2	2	66.8	0.1	0	0	0	0	0	0	0.01		0.01	0
3	9	1	2	1	2	2	1	2	1	1	1	1	2	2	1	1	1	1	1			2	100	1.26	0	0.67	2.9	2.83	1.52	2.72	1.04			0.68
3	16	1	2	1	2	1	1	2	1	1	1	1	2	2	2	2	2	2	2	2		2	100	0.94	0	0.27	0.4	0.27	0.17	0.54	0.21	0.3		0.2
3	9	1	2	1	1	1	1	2	1	1	1	2	1	2	2	1	1	2	2	2	1	2	14.1	0.01	1.5	0	0	100	100	0.1	0.03	0.03	1.41	0
3	15	2	2	1	2	1	1	2	1	1	1	2	2	2	2	1	1	2	2	2	1	2	62.8	0.36	0	0.48	0.36	44.9	43.7	0.43	0.17	0.55	4.81	0.23
3	7	2	2	1	1	1	1	2	1	1	1	2	2	2	2	1	1	2	2			2	80.4	0.1	0.15	0	0	5.34	5.46	0	0.02			0
3	7	2	2	1	1	1	1	2	1	1	2	1		1	1	1	1	1	2	1	1	1	0	2.02		10.5	5.9	100	100	1.84	0.46	4.46	33.2	1.16
3	13	1	2	1	2	2	2	2	2	2	1	2		2	2	2	2	2	2	2	2	2	27.4	0		0	0.01	0	0	0.02	0	0	0	0
3	12	1	2	1	1	1	2	2	2	1	1	2	2	2	2	2	2	2	2	2	2	2	5.92	0.01	0	0	0	0.36	0.68	0	0.01	0.03	0.01	0
3	10	1	1	1	2	2	2	2	2	2	2	2	2	2	2	2	2	2	2			2	0	0.1	0	0	0	0	0	0	0.01			0
3	12	1	1	1	1	1	2	2	2	1	1	2	2	2	2	1	1	2	2	2	2	2	19.7	0.06	0.2	0	0.1	3.74	7.36	0.1	0.04	0.09	0.21	0
3	11	1	1	1	2	2	2	2	2	1	1	1	1	1	1	1	1	1	1	1		1	5.73	0.87	0.92	0.9	0.99	1.03	0.88	0.9	0.8	0.89		0.76
3	11	1	2	1	2	2	2	2	2	2	2	2	2	2	2	2	2	2	2	2		2	0.26	0.1	0	0	0.01	0	0	0	0.01	0.01		0
3	12	1	2	1	2	2	2	2	2	1	1	2	2	2	2	1	1	2	2	2		2	1.76	0.11	0	0	0	16.3	17.3	0	0.08	0.06		0.13
3	11	1	2	1	1	2	1	2	2	2	1	2		2	2	2	2	2	2	2	2	2	100	0.07		0.11	0.09	0	0	0.33	0.08	0.06	0.06	0.07
3	10	1	1	1	2	2	2	2	2	1	1	2	2	2	2	2	2	2	2	2	2		4.01	0.04	0	0	0	0	0	0	0.09	0.16	0.05
3	10	1	2	1	1	1	2	2	2	1	1	2	1	2	1	1	1	1	2	1	1	2	7.1	0.43	0.79	0.24	0.84	62.9	68.3	0.78	0.18	1.64	5.17	0.21
3	9	1	2	1	1	2	2	2	2	1	1	1	2	2	1	1	1	1	2	1	1	2	33.1	1.55	0	0.47	0.95	41.5	38.4	1.49	0.25	0.76	1.76	0.33
3	11	1	2	1	1	1	1	2	2	1	1	1	2	1	1	1	1	2	2			1	100	1.06	0	1.31	1.5	40.5	54.5	0.64	0.56			1.01
3	9	1	2	1	1	1	2	2	2	2	1	2	2	2	2	2	2	2	2	2		2	13.9	0.1	0	0	0	0	0	0	0.04	0.04		0
3	8	1	2	1	2	2	2	2	2	1	1	2	2	2	2	1	1	2	2	2		2	28.8	0.11	0.23	0.23	0.21	8.78	8.87	0.18	0.11	0.22		0.11
3	9	1	2	1	1	1	2	2	2	1	1	2	2	2	2	1	1	2	2	2	2	2	56.1	0.1	0	0	0	5.57	5.49	0	0.01	0	0.13	0
3	9	1	2	1	2	1	2	2	2	1	1	2		2	2	2	2	2	2	2	2	2	16.8	0.43		0.32	0.4	0.31	0.42	0.31	0.5	0.54	0.25	0.2
3	6	1	1	1	2	2	2	2	2	2	1	2	2	2	2	2	2	2	2	2		2	45.4	0.1	0	0	0	0	0	0	0.01	0.07		0
3	6	1	1	1	2	2	2	2	2	2	1	2	2	2	2	2	2	2	2	2		2	75.4	0.1	0	0	0.11	0	0	0	0.01	0.02		0
3	5	1	2	1	2	1	2	2	2	2	2	2	2	2	2	2	2	2	2	2	2	2	0	0.1	0	0	0	0	0	0	0.01	0.02	0.01	0
3	5	1	2	1	1	2	2	2	2	1	1	2	2	2	2	2	1	2	2	2		2	0.88	0.1	0	0	0	0.38	1.19	0	0.01	0.01		0
3	9	1	2	1	1	2	2	2	2	1	1	2	2	2	2	2	2	2	2	2	2	2	100	0	0	0	0	0	0	0	0.02	0.03	0.03	0
3	5	1	1	1	1	2	2	2	2	1	1	2	2	2	2	2	2	2	2	2		2	100	0.12	0	0.17	0.45	0.12	0.1	0.19	0.11	0.1		0
3	12	1	2	1	1	2	2	2	2	2	1	2	2	2	2	2	2	2	2			2	100	0.11	0	0.13	0.13	0.14	0.11	0.14	0.09			0
3	13	1	2	1	1	2	2	2	2	1		2	2	2	2	2	2	2	2	2		1		0.1	0	0	0	0	0	0	0.01	0.01		5.96
3	10	1	1	1	1	2	2	2	2	2	1	2	2	2	2	2	2	2	2			2	14.2	0.1	0	0	0	0.23	0.27	0	0.01			0
3	12	1	1	1	1	2	2	2	2	2	1	2		2	2	2	2	2	2	2	2	2	63.6	0		0	0	0	0.01	0.02	0	0	0	0
3	13	1	1	1	1	2	2	2	2	2	1	2	2	2	2	2	2	2	2	2		2	100	0.1	0	0	0	0	0	0.11	0.02	0.23		0
3	5	1	2	1	2	2	2	2	2	1	2	2	2	2	2	1	1	2	2			2	0	0.35	0	0.21	0.18	14.6	23.8	0.25	0.13			0.11
3	9	1	1	1	1	2	2	2	2	1	1	2	2	2	2	1	1	2	2	2	1	2	16	0.1	0	0	0	55.9	52.2	0	0.04	0.11	3.71	0
3	8	1	2	1	1	2	2	2	2	2	2	2	2	2	2	2	2	2	2			2	0.14	0.1	0	0	0	0	0	0	0.01			0
3	7	1	2	1	1	1	2	2	2	2	1	2	2	2	2	2	2	2	2	2	2	2	1.47	0.01	0	0	0	0	0	0	0.01	0.02	0	0
3	9	1	2	1	1	1	2	2	2	1	1	2		2	2	2	2	2	2	2	2	2	100	0.25		0.08	0.14	0.15	0.17	0.57	0.11	0.17	0.1	0.21
3	15	2	2	1	2	2	2	2	2	1	2	2	2	2	2	2	2	2	2	2			0	0.1	0	0	0	0	0	0	0.01	0.03
3	12	2	2	1	2	1	2	2	2	2	1	2	2	2	2	2	2	2	2	2	2	2	70.3	0.1	0	0	0	0	0	0	0.03	0.05	0.03	0
3	9	2	2	1	1	1	1	2	2	2	1	2	2	2	2	2	2	2	2	2	2	2	3.24	0.1	0.1	0.13	0.1	0	0.1	0.11	0.26	0.26	0.06	0
3	8	2	2	1	2	2	2	2	2	2	2	2	2	2	2	2	2	2	2			2	0	0.1	0	0	0	0	0	0	0.01			0
3	8	2	2	1	2	2	2	2	2	1	1	2	2	2	2	2	2	2	2	2		2	100	0.21	0.18	0.23	0.32	0.49	0.4	0.22	0.15	0.25		0.16
3	10	2	2	1	1	1	2	2	2	2	1	2		2	2	2	2	2	2	2	2	2	100	0.16		0.18	0.21	0.19	0.22	0.21	0.22	0.43	0.24	0.16
3	6	2	2	1	1	1	2	2	2	1	1	2	2	2	2	2	2	2	1	2		1	89.4	0.63	0	0	0.32	0.39	0.16	0.55	5.63	0.12		25.2
3	8	2	1	1	1	2	2	2	2	2	1	2	2	2	2	2	2	2	2	2		2	100	0.18	0	0.2	0.33	0.14	0.12	0.2	0.13	0.2		0.1
3	6	2	1	1	1	2	2	2	2	2	1	2	2	2	2	2	2	2	2	2		2	100	0.1	0	0	0	0	0	0	0.01	0.03		0
3	6	2	2	2	1	1	1	2	2	2	1	2	2	2	2	2	2	2	2	2		2	1.52	0.01	0.1	0	0	0	0	0.1	0.01	0		0
3	6	2	2	1	1	1	2	2	2	1	2	2	2	2	2	2	2	2	2	2	2	2	0.39	0.04	0.1	0	0.1	0	0	0.1	0.01	0.01	0	0
3	7	2	2	1	1	2	2	2	2	1	1	2	2	2	2	2	2	2	2	2		2	14.1	0.24	0.25	0.28	0.36	0.16	0.16	0.25	0.23	0.34		0.18
3	7	2	2	1	2	2	2	2	2	1	1	2	2	2	2	2	2	2	2	2	2	2	100	0.05	0.1	0	0.1	0	0	0.1	0.04	0.09	0.03	0
3	11	2	1	1	2	2	2	2	2	2	1	2	2	2	2	2	2	2	2	2		2	100	0.18	0	0.17	0.41	0.12	0.1	0.19	0.1	0.17		0.12
3	17	2	2	1	1	1	1	2	2	1	1	2	2	2	2	1	1	2	2	2	2	2	66.5	0.1	0.39	0	0	4.75	5.82	0	0.01	0.01	0.02	0
3	7	2	1	1	2	1	1	2	2	2	2	2	2	2	2	2	2	2	2	2	2	2	0	0.01	0	0	0	0	0	0	0.01	0	0	0
3	8	2	2	1	2	2	2	2	2	2	1	2	2	2	2	2	2	2	2	2	2	2	1.69	0.01	0	0	0	0	0	0	0.01	0	0	0
3	6	2	2	1	1	2	1	2	2	2	1	2		2	2	2	2	2	2	2	2	2	5.55	0		0	0	0	0	0.01	0	0.02	0	0
	9
	5
	17
