# Supplementary material for: Relationship among airborne pollen, sensitization, and pollen food allergy syndrome in Asian allergic children
Source: PeerJ journal article supplement (doi:10.7717/peerj.14243), 2022-11-01
Supplement: Supplementary_Table1.pdf [file Supplementary_Table1.pdf]

**STUDY NUMBER** \_\_\_\_\_ **INITIALS** \_\_\_\_\_ **DATE** \_\_\_\_\_

**Q1** Do you have hay fever? Yes    No

If yes do you get symptoms mainly in the:

- |                                                                   |                                                        |
|-------------------------------------------------------------------|--------------------------------------------------------|
| <input type="checkbox"/> Spring time (February/March to May/June) | <input type="checkbox"/> Autumn (October to December)  |
| <input type="checkbox"/> Summertime (May/June to August)          | <input type="checkbox"/> Winter (November to February) |
|                                                                   | <input type="checkbox"/> All year round                |

**Q2** Have you ever had any allergic reactions to food? Yes    No

**If no – stop here and hand the questionnaire back to the researcher**

**Q3** Do you experience reactions to foods all year round? Yes    No  
If no – do you only get reactions to food during your main hay fever season? Yes    No

**Q4** Which foods do you have a reaction to:

**Column A**

- Fruit or vegetables
- Bean sprouts, salad leaves or herbs
- Nuts including all tree nuts and peanuts
- Peeling potatoes or other root vegetables
- Beans, lentils, chickpeas or other legumes

**Column B**

- Milk, eggs, chicken
- Fish, shellfish
- Wheat or other cereal
- Other food

**Q5** If reactions are to any food in column A, is your reaction to:

- |                                                    |                                            |
|----------------------------------------------------|--------------------------------------------|
| <input type="checkbox"/> Raw foods only            | <input type="checkbox"/> Cooked foods only |
| <input type="checkbox"/> Both raw and cooked foods | <input type="checkbox"/> Not sure          |

**Q6** How quickly do the symptoms occur (tick one)

- |                                                                 |                                                         |
|-----------------------------------------------------------------|---------------------------------------------------------|
| <input type="checkbox"/> On touching lips                       | <input type="checkbox"/> Within 30 minutes of eating    |
| <input type="checkbox"/> On biting or chewing                   | <input type="checkbox"/> 1-2 hours after eating         |
| <input type="checkbox"/> On or up to 5 minutes after swallowing | <input type="checkbox"/> 2-4 hours after eating         |
| <input type="checkbox"/> Within 15 minutes of eating            | <input type="checkbox"/> More than 6 hours after eating |

**Q7** Which of the following symptoms do you have after eating foods to which you are allergic (tick all that apply and grade each symptom from 0-3 (0 = none, 1 = mild, 2 = moderate, 3 = severe):

- Tingling/numbness of lips/mouth or strange mouth sensation (\_\_\_\_)
- Intense itching of the lips, mouth, palate or ears (\_\_\_\_)
- Scratchy/sore throat (\_\_\_\_)
- Urticarial rash (nettle rash) either on contact (e.g. peeling potatoes) or on eating (\_\_\_\_)
- Swelling of lips, tongue, mouth or throat (\_\_\_\_)
- Anaphylaxis (rapid onset of flushing, with severe difficulty in breathing or collapse) (\_\_\_\_)
- Asthma (\_\_\_\_)
- Rhinitis (hay fever) (\_\_\_\_)
- Eczema (\_\_\_\_)
- Vomiting, Diarrhoea or bloating(\_\_\_\_)
- Other (\_\_\_\_)
